# Supplementary material for: Single Gene Mutations in Pkd1 or Tsc2 Alter Extracellular Vesicle Production and Trafficking
Source: MDPI journal article supplement (doi:10.3390/biology11050709), 2022-05-06

**Supplementary Figure S1: EV isolation flow diagram.**

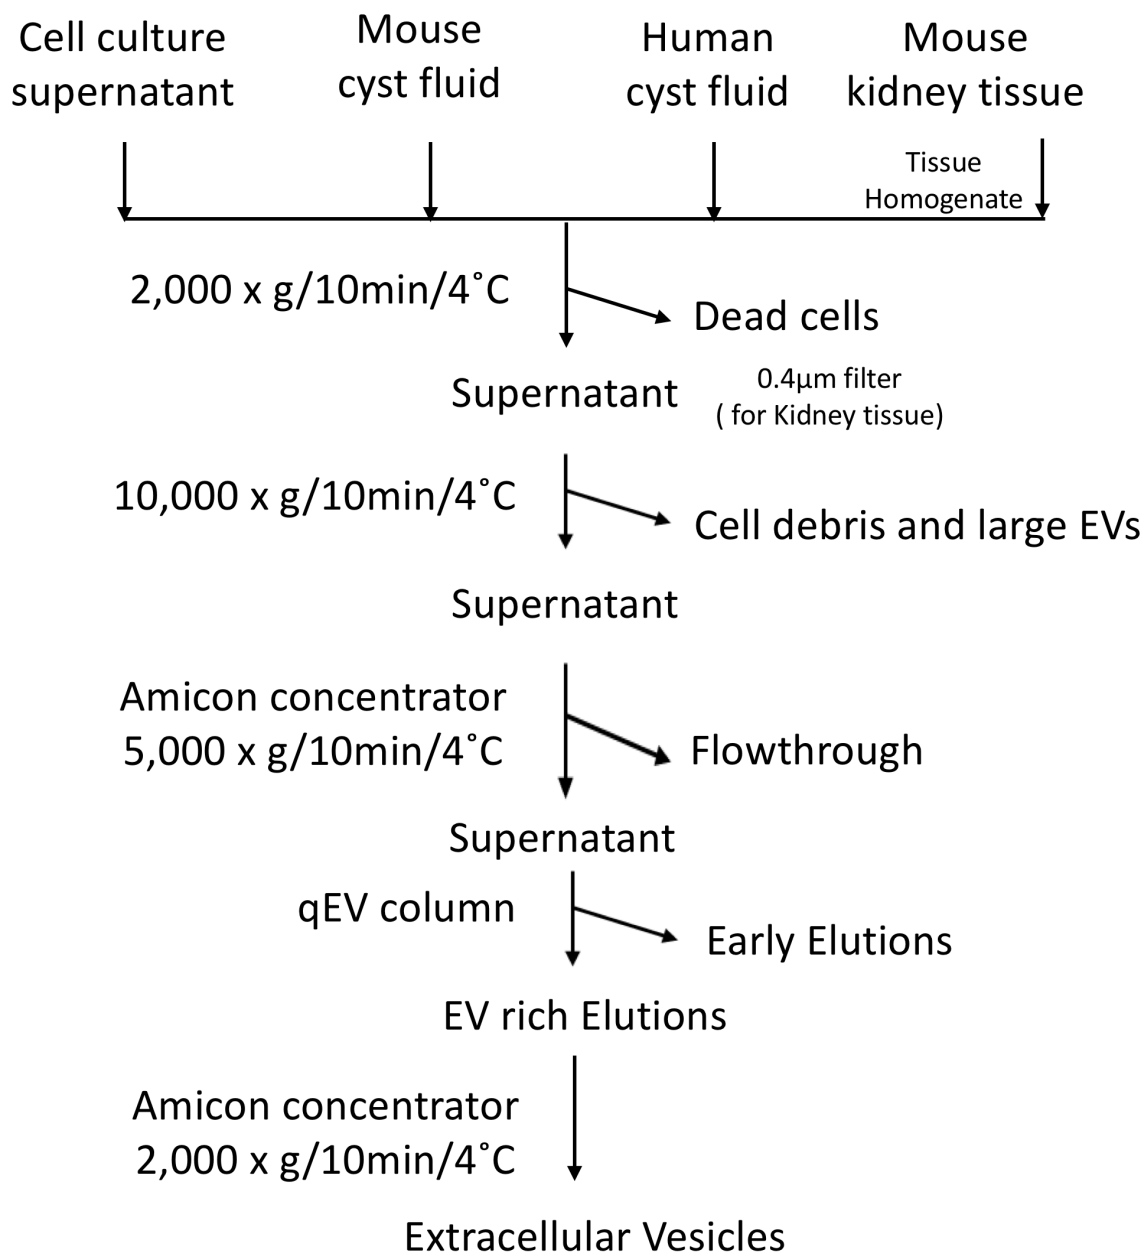

Supplementary Figure S2a: In vitro trafficking - *Tsc*

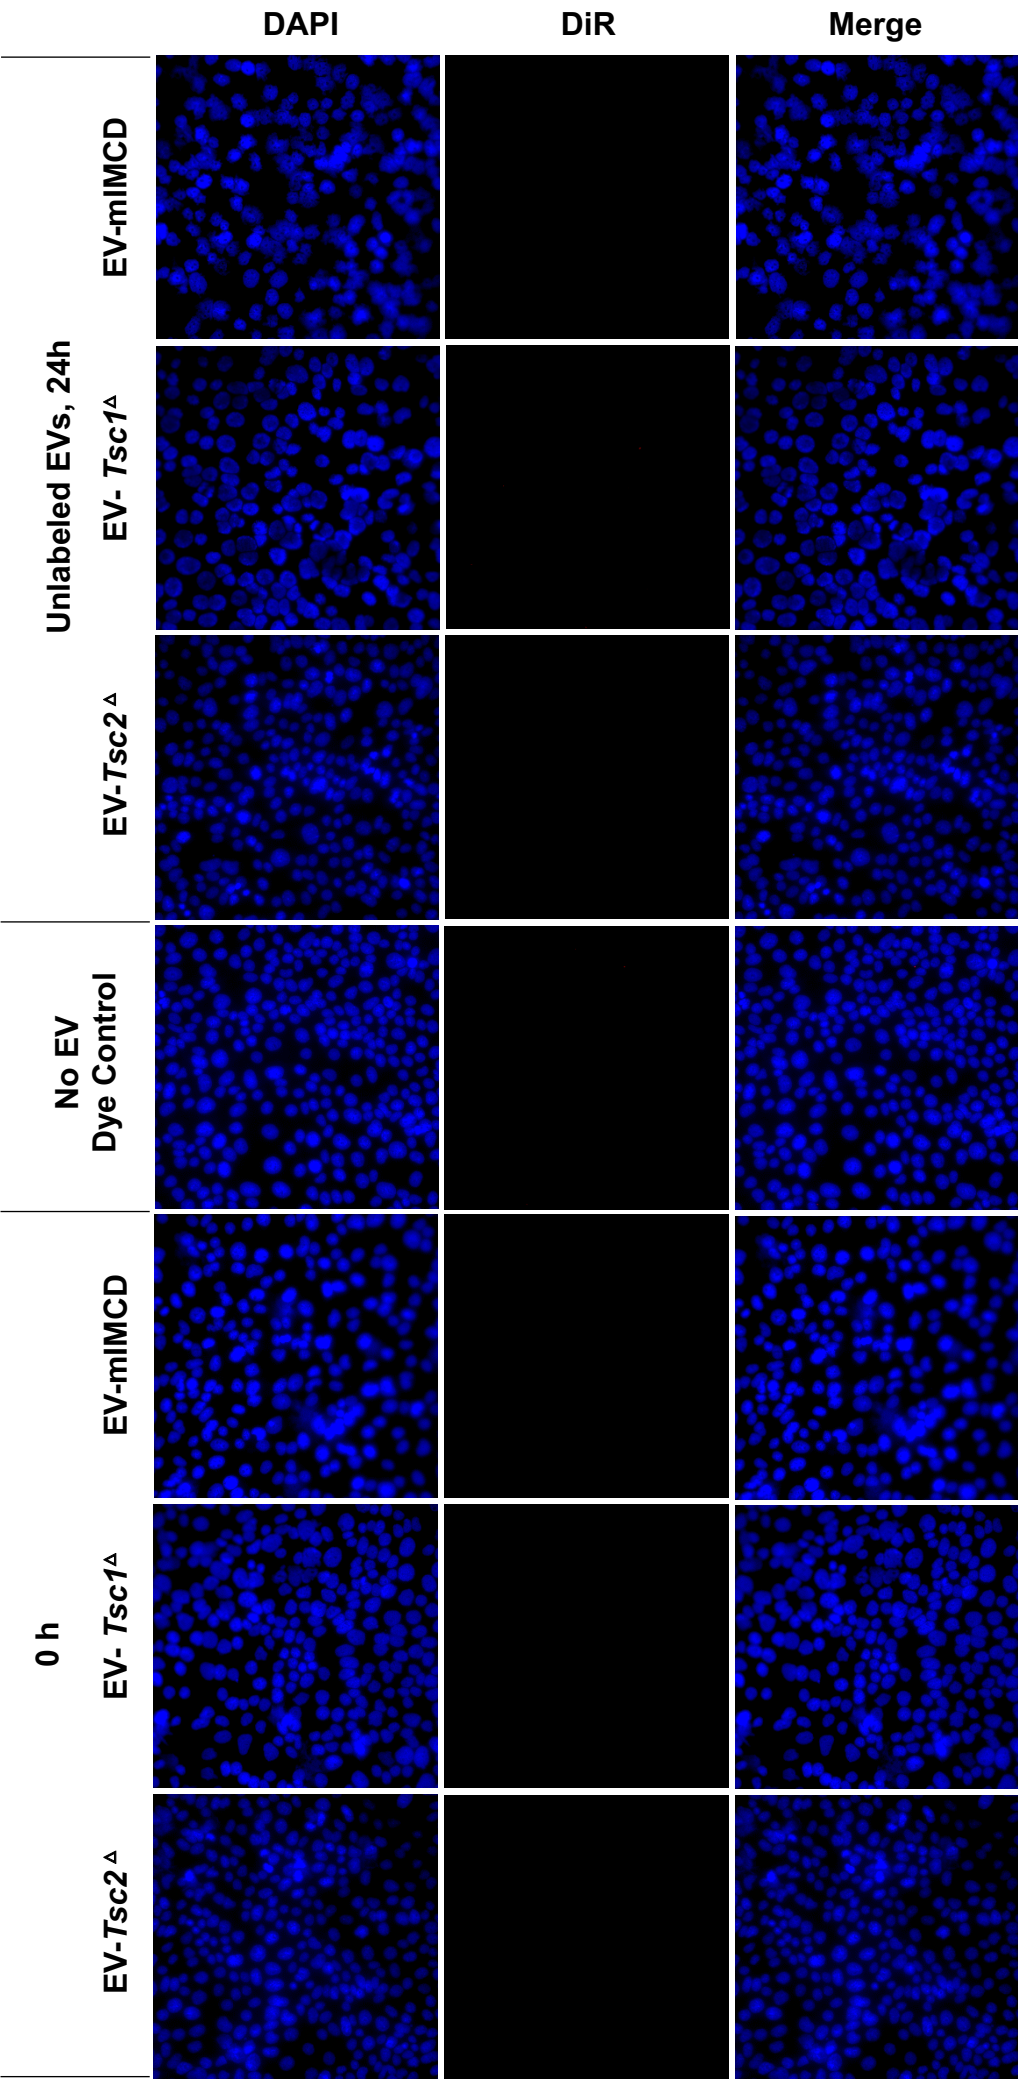

Supplementary Figure S2b: In vitro trafficking - *Tsc*

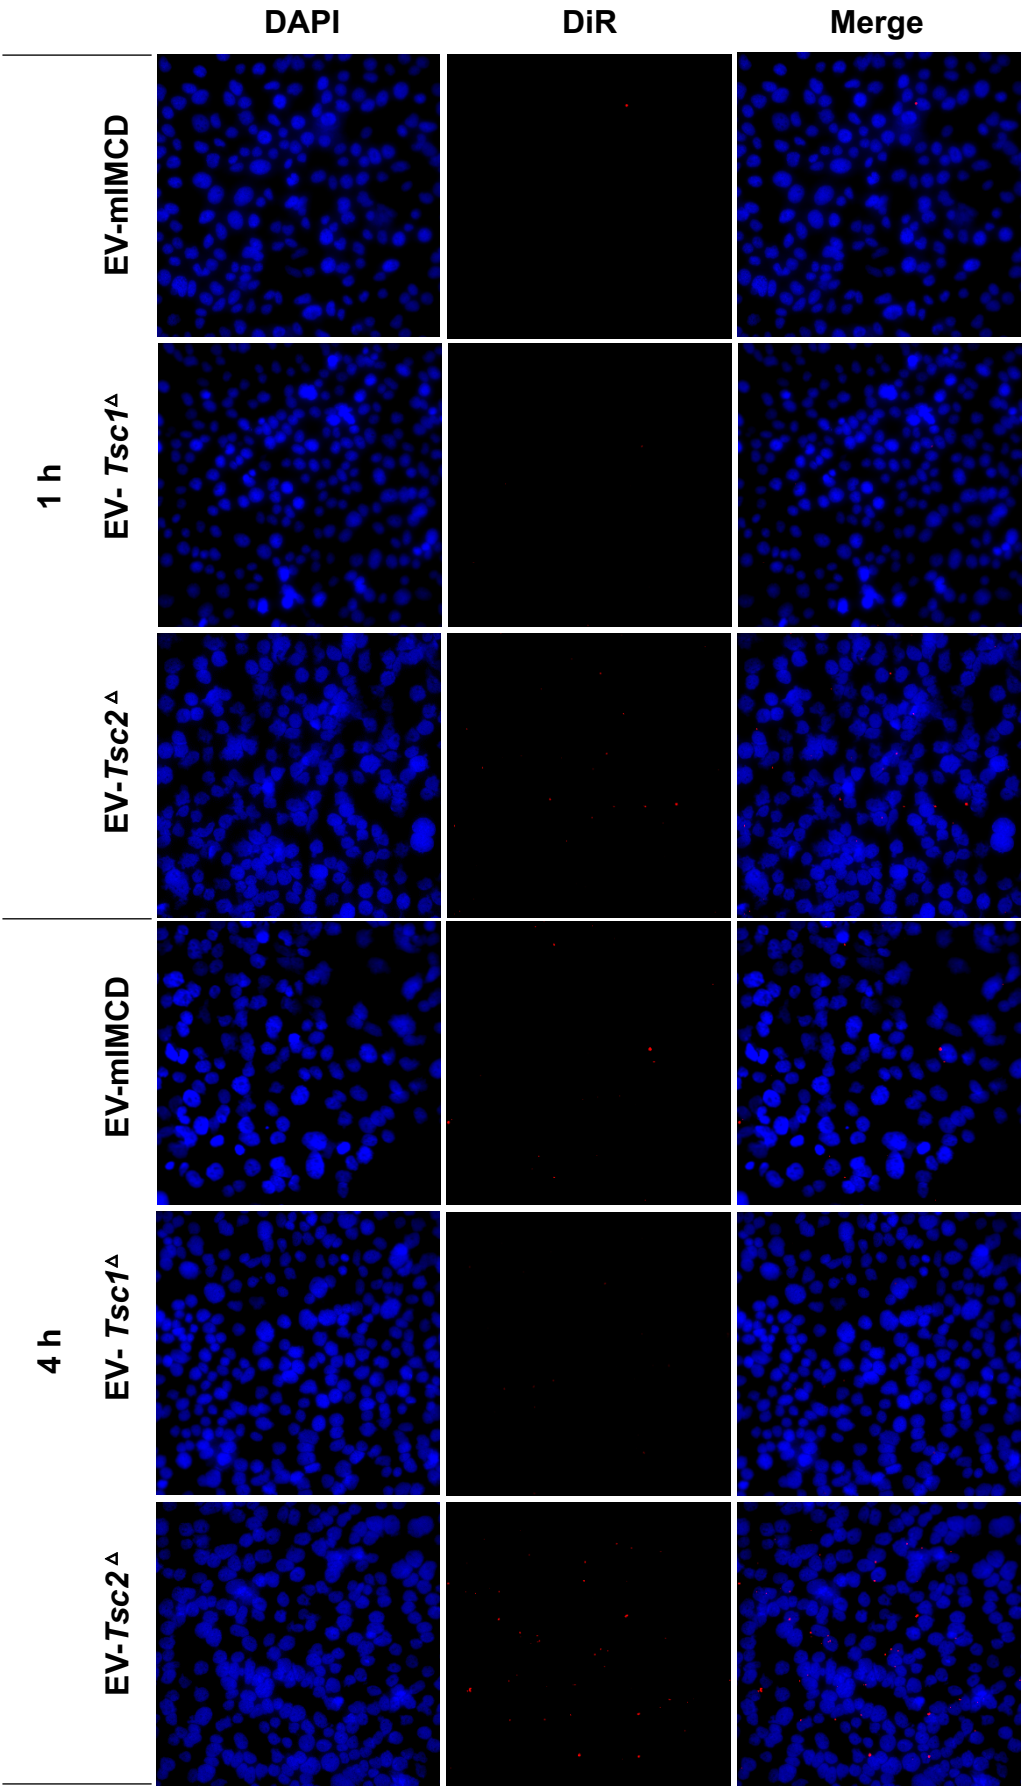

Supplementary Figure S2c: In vitro trafficking - *Tsc*

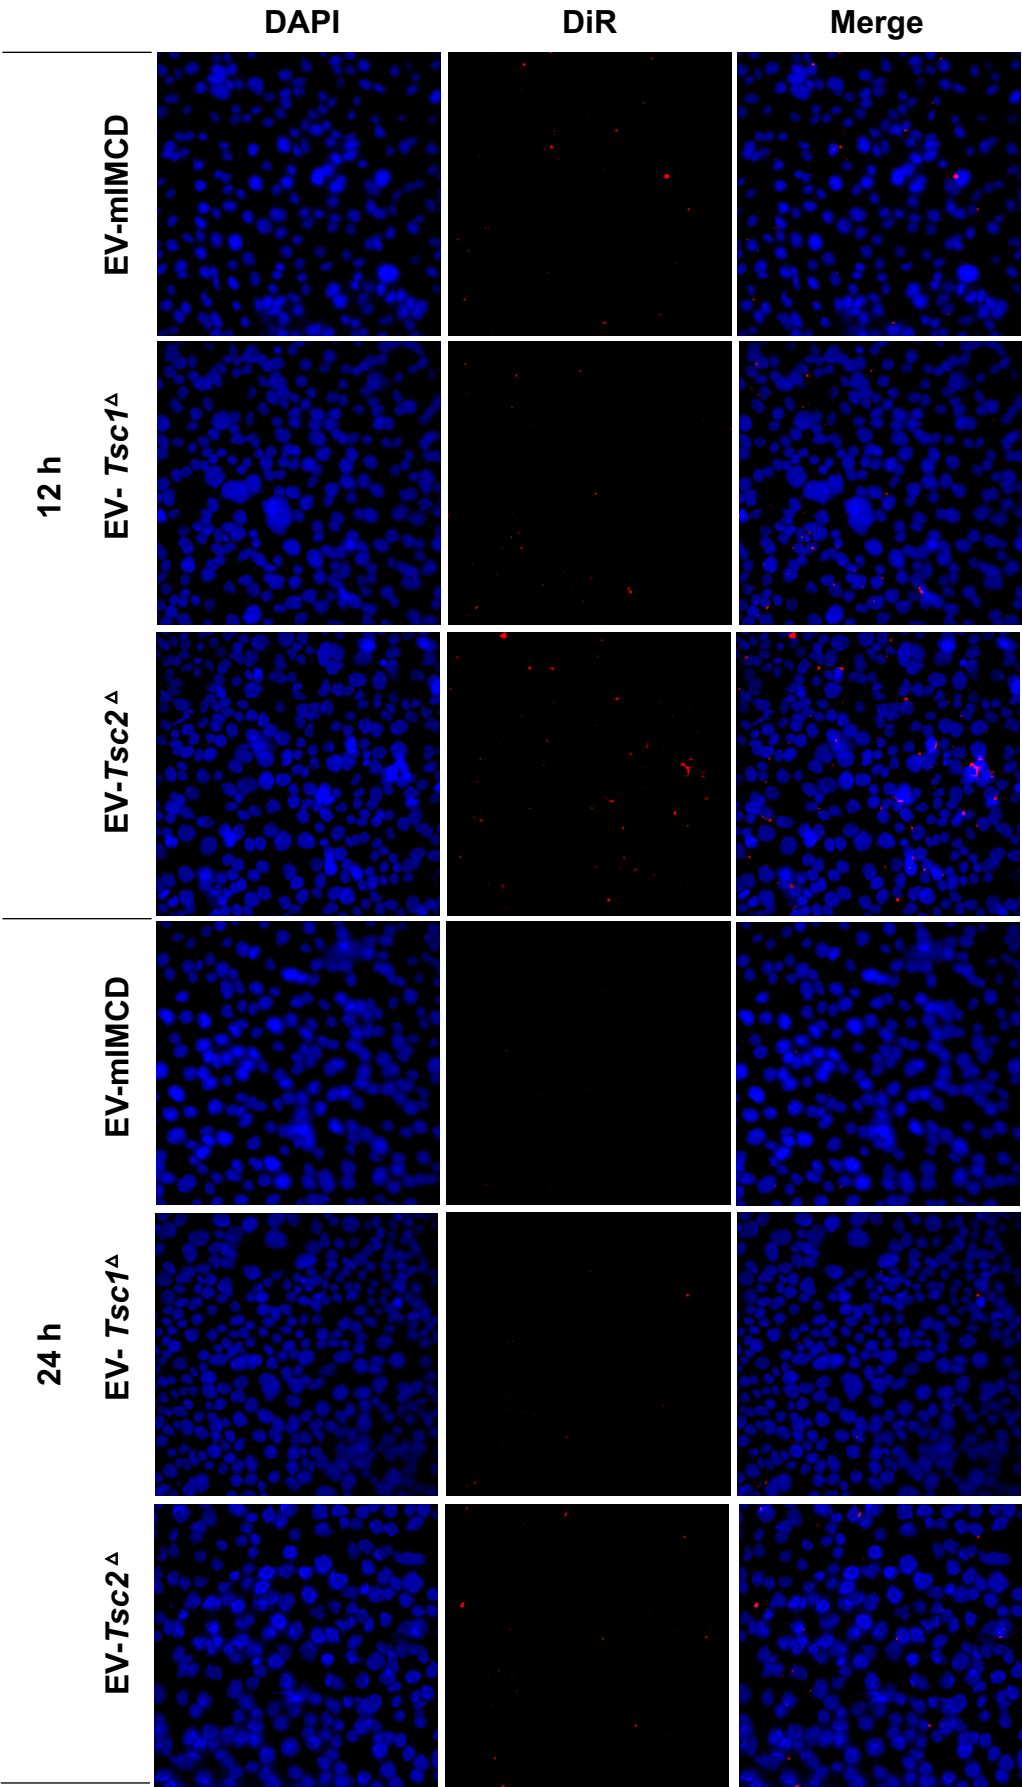

Supplementary Figure S2d: In vitro trafficking - *pkd*

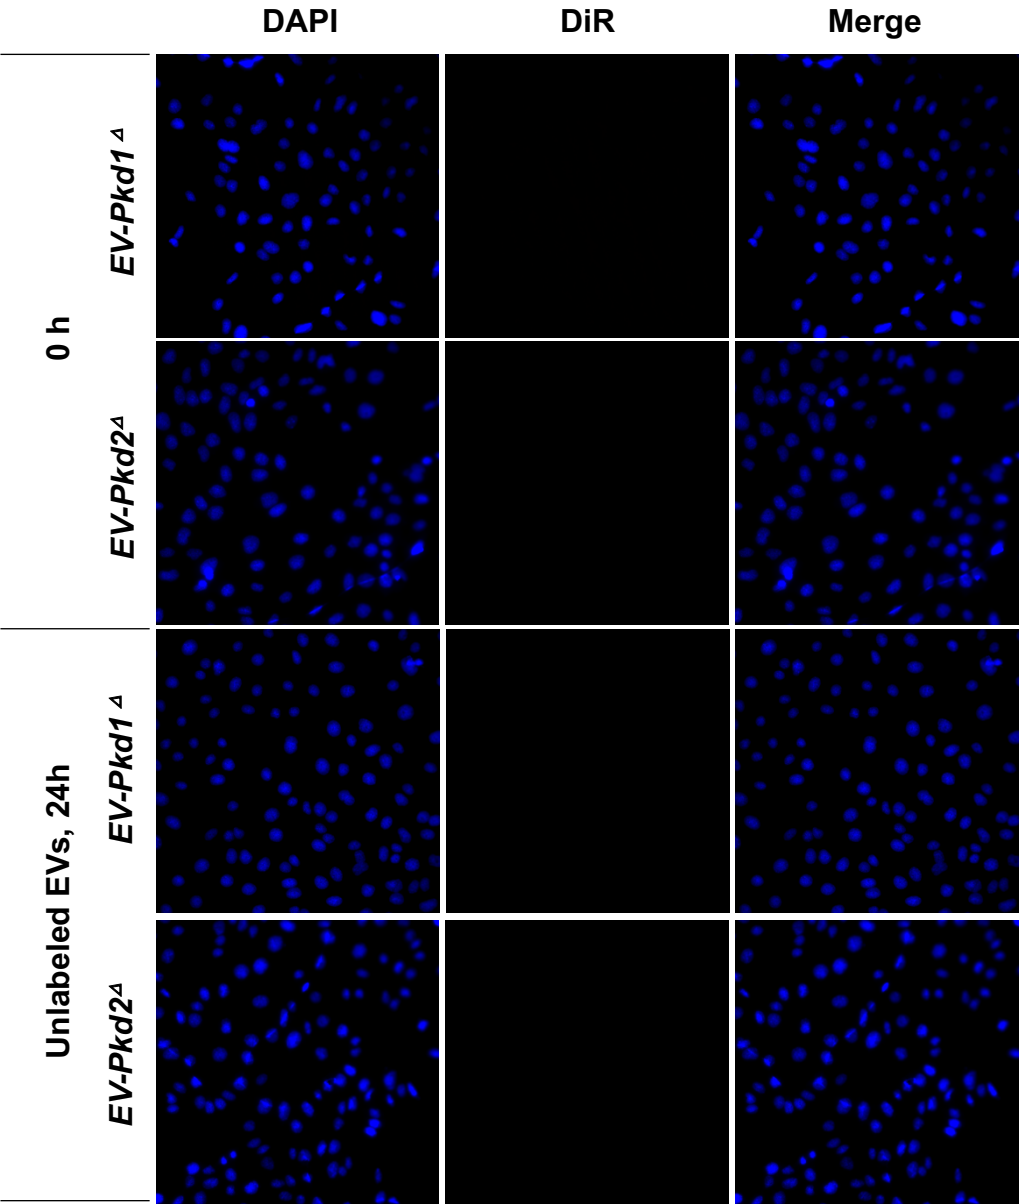

Supplementary Figure S2e: In vitro trafficking - *pkd*

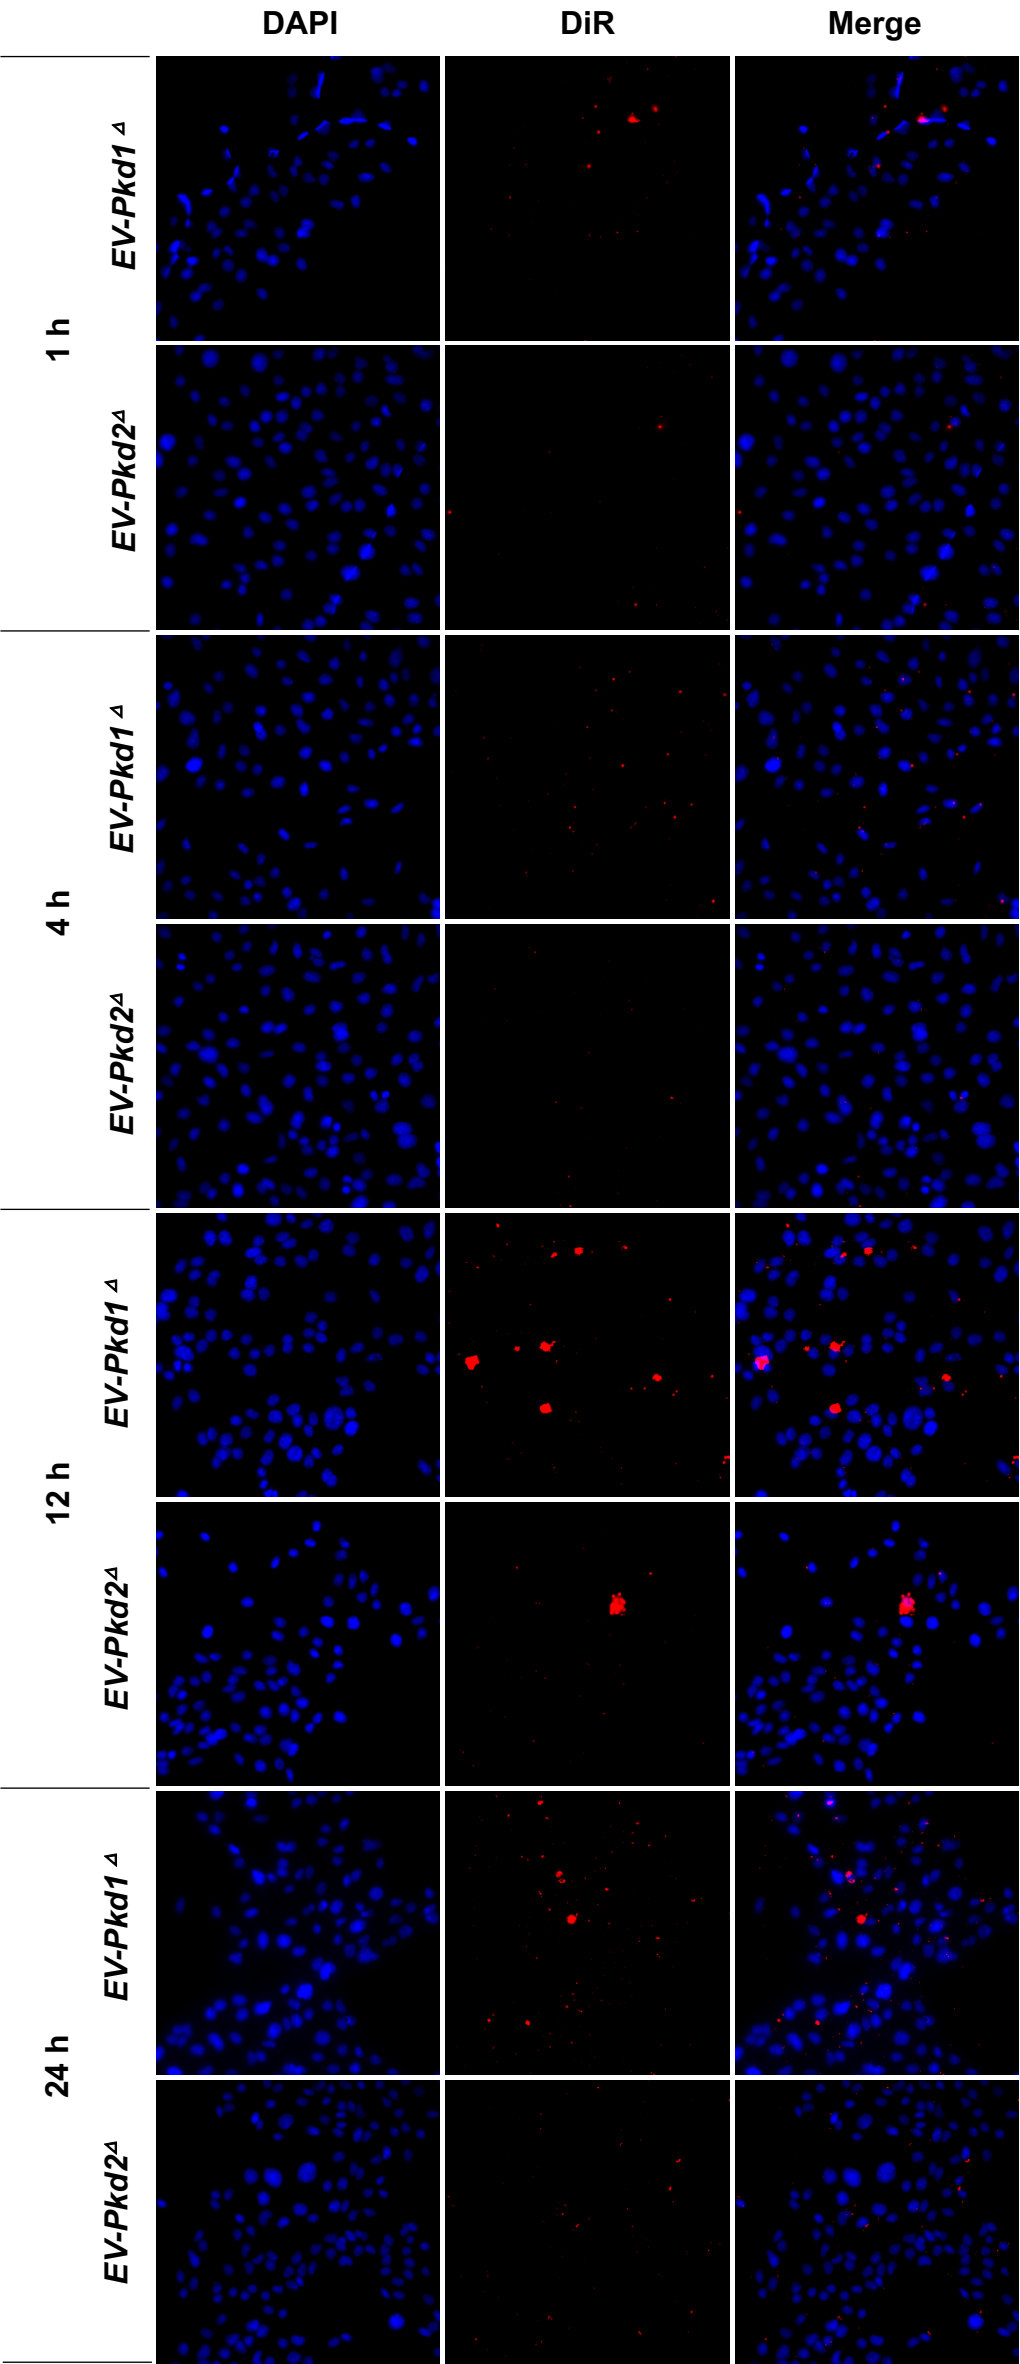

Supplement: s1 [file s1]
